# Supplementary material
Source: PubMed Central journal article supplement (PMC4702676)
Supplement: JVI.01805-15_zjv999091163so1.pdf [file JVI.01805-15_zjv999091163so1.pdf]

**Figure S1. Competition-binding of human mAbs against DENV2 antigen**

| 2nd<br>1st | 1B22 | 1C6 | 1H10 | 1L13 | 2H12 | 2K2 | 2M2 | 4E9 | 4F8 | 4G21 | 5E15 | 5G22 | 3D18 |
|------------|------|-----|------|------|------|-----|-----|-----|-----|------|------|------|------|
| 1B22       | X    | +   | +    | +    | +    | +   | +   | +   | +   | +    | +    | +    | 0    |
| 1C6        | +    | X   | +    | +    | +    | +   | +   | +   | +   | +    | +    | +    | 0    |
| 1H10       | +    | +   | X    | +    | +    | +   | +   | +   | +   | +    | +    | +    | 0    |
| 1L13       | +    | +   | +    | X    | +    | +   | +   | +   | +   | +    | +    | +    | 0    |
| 2H12       | +    | +   | +    | +    | X    | +   | +   | +   | +   | +    | +    | +    | 0    |
| 2K2        | +    | +   | +    | +    | +    | X   | +   | +   | +   | +    | +    | +    | 0    |
| 2M2        | +    | +   | +    | +    | +    | +   | X   | +   | +   | +    | +    | +    | 0    |
| 4E9        | +    | +   | +    | +    | +    | +   | +   | X   | +   | +    | +    | +    | 0    |
| 4F8        | +    | +   | +    | +    | +    | +   | +   | +   | X   | +    | +    | +    | 0    |
| 4G21       | +    | +   | +    | +    | +    | +   | +   | +   | +   | X    | +    | +    | 0    |
| 5E15       | +    | +   | +    | +    | +    | +   | +   | +   | +   | +    | X    | +    | 0    |
| 5G22       | +    | +   | +    | +    | +    | +   | +   | +   | +   | +    | +    | X    | 0    |
| 3D18       | 0    | 0   | 0    | 0    | 0    | 0   | 0   | 0   | 0   | 0    | 0    | 0    | X    |

The symbol “+” indicates that the antibody pairing competed for the same site on the antigen, defined as >75% reduction of binding of the 2nd antibody compared to un-competed binding; the symbol “0” indicates that the antibody pairing did not compete for the same site on the antigen. Each of the antibodies successfully competed for binding with self (grey X). As a control reagent we used the human mAb 3D18 that recognizes the DENV E protein fusion loop.

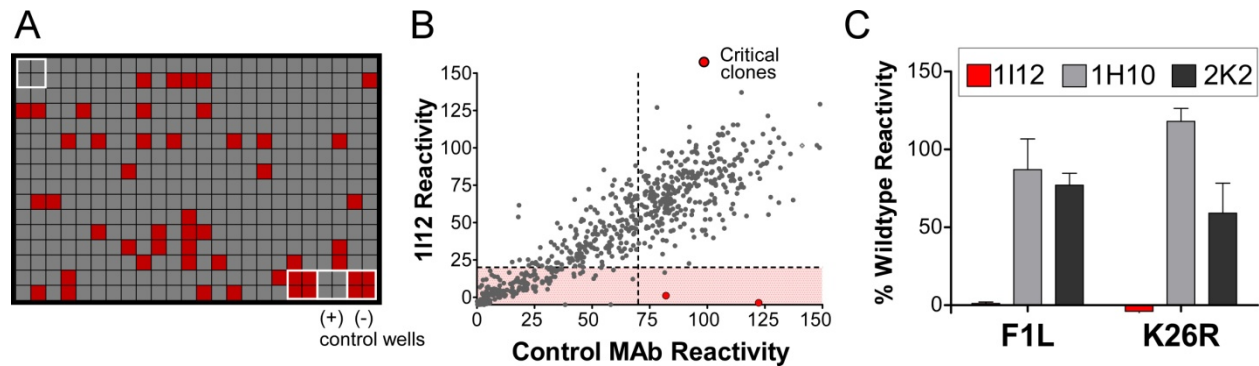

**Figure S2. Identifying critical residues for prM MAb binding.** (A) The shotgun mutagenesis mutation library for DENV3 prM/E is arrayed in 384-well plates, with each well of each mutation array plate containing one mutant with a defined substitution. MAb reactivity results for a representative 384-well plate are illustrated. Eight positive (wild-type prM/E) and eight negative (mock-transfected) control wells were included on each plate. (B) Human HEK293T cells expressing the DENV3 prM/E envelope mutation library were tested for immunoreactivity with MAb 1112, which was measured using an Intellicyt high-throughput flow cytometer. Using algorithms described elsewhere (Davidson and Doranz 2014; U.S. patent application 61/938,894), clones with reactivity of <20% relative to that of wild-type DENV2 prM/E yet >70% reactivity for a control MAb were initially identified to be critical for 1112 binding. (C) Mutation of two individual residues reduced MAb 1112 binding (red bars) but did not greatly affect the binding of other conformation-dependent MAbs (gray bars). Bars represent the mean and range of at least two replicate data points.

**Table S1. Critical residues identified by shotgun mutagenesis epitope mapping**

| MAb   | Mutation Array | Epitope Location                                | Critical Residues [numbering on PDB ID #3C6E (prM) or PDB ID# 1UZG (E protein)] |
|-------|----------------|-------------------------------------------------|---------------------------------------------------------------------------------|
| 1B22  | DENV3          | prM                                             | L3                                                                              |
| 1C6   | DENV3          | prM                                             | F1, K26                                                                         |
| 1E16  | DENV3          | prM                                             | F1, E18, K26                                                                    |
| 1E23  | DENV3          | prM                                             | L3, S5, E9, K26                                                                 |
| 1G6   | DENV3          | prM/ E protein Fusion Loop/Domain II            | S5, G102                                                                        |
| 1G10  | DENV3          | prM                                             | E18, K26                                                                        |
| 1H7.2 | DENV3          | prM                                             | K26                                                                             |
|       | DENV4          | prM                                             | F1, K26                                                                         |
| 1H10  | DENV3          | prM                                             | L3, S5                                                                          |
| 1I12  | DENV3          | prM                                             | F1, K26                                                                         |
| 1K20  | DENV3          | prM                                             | K26                                                                             |
| 1L13  | DENV3          | prM                                             | F1, L3, E18, K26                                                                |
| 1O6   | DENV3          | prM                                             | F1, E18, K26                                                                    |
| 2B17  | DENV3          | prM                                             | F1, L3, K26                                                                     |
| 2G3   | DENV3          | prM                                             | F1, L3, S5, E9, K26                                                             |
| 2H12  | DENV3          | prM                                             | K26                                                                             |
| 2H21  | DENV3          | prM                                             | K26                                                                             |
|       | DENV4          | prM                                             | F1, E18, L24, K26                                                               |
| 2J9   | DENV3          | prM                                             | F1, L3, K26                                                                     |
| 2K2   | DENV3          | prM                                             | L3                                                                              |
|       | DENV4          | prM                                             | L3                                                                              |
| 2M2   | DENV3          | (Western blot indicates binding to prM and Env) | No critical residues identified                                                 |
|       | DENV4          | (Western blot indicates binding to prM and Env) | No critical residues identified                                                 |
| 4E9   | DENV3          | prM                                             | No critical residues identified                                                 |
| 4F8   | DENV3          | prM                                             | L3, S5                                                                          |
| 4G21  | DENV3          | prM                                             | S5, E18                                                                         |
| 5E15  | DENV3          | prM                                             | L3                                                                              |
| 5G22  | DENV3          | prM                                             | L3, S5, E9, K26                                                                 |
| 5M22  | DENV4          | prM                                             | K26                                                                             |

| MAb   | Mutations |         |         |         |             |         |             |         |             |
|-------|-----------|---------|---------|---------|-------------|---------|-------------|---------|-------------|
|       | F1L       | L3R     | S5R     | E9D     | E18D        | K26R    | W101<br>C   | G102R   | H242R       |
| 1B22  | 51 (9)    | 32 (7)  | 40 (14) | 57 (10) | 95 (18)     | 94 (17) | 69 (15)     | 84 (13) | 128<br>(37) |
| 1C6   | 27 (1)    | 28 (5)  | 40 (3)  | 60 (6)  | 43 (2)      | 7 (1)   | 79 (1)      | 61 (7)  | ND          |
| 1E16  | 18 (1)    | 62 (3)  | 29 (3)  | 44 (1)  | 22 (5)      | 3 (1)   | 97 (5)      | 77 (8)  | 99 (4)      |
| 1E23  | 59(3)     | 1 (1)   | 1 (1)   | 26 (5)  | 99 (8)      | 0 (1)   | 77 (0)      | 52 (5)  | 64 (3)      |
| 1G6   | 61(24)    | 44 (10) | 20 (9)  | 55 (9)  | 96 (22)     | 72 (13) | 20 (2)      | 10 (12) | 3 (2)       |
| 1G10  | 26(1)     | 66 (22) | 33 (3)  | 39 (4)  | 23 (2)      | 5 (2)   | 120 (7)     | 83 (3)  | 75 (11)     |
| 1H7.2 | 72(1)     | 33 (0)  | 62 (1)  | 84 (1)  | 98 (12)     | 24 (5)  | 88 (8)      | 71 (3)  | 98 (2)      |
| 1H10  | 87(15)    | 1 (5)   | 25 (4)  | 65 (16) | 84 (14)     | 118 (8) | 93 (32)     | 71 (16) | 110 (3)     |
| 1I12  | 1 (0)     | 62 (2)  | 48 (3)  | 55 (8)  | 74 (4)      | -4 (1)  | 64 (5)      | ND      | ND          |
| 1K20  | 59 (1)    | 62 (3)  | 58 (1)  | 50 (0)  | 83 (15)     | 15 (1)  | 64 (9)      | 69 (10) | 87 (4)      |
| 1L13  | 10 (1)    | 14 (2)  | 57 (3)  | 66 (19) | 15 (3)      | 8 (0)   | 69 (8)      | ND      | ND          |
| 1O6   | 1 (1)     | 58 (7)  | 51 (3)  | 50 (3)  | 6 (1)       | 10 (1)  | 89 (3)      | 74 (11) | 102<br>(14) |
| 2B17  | 0 (1)     | 10 (1)  | 46 (1)  | 42 (5)  | 84 (6)      | 2 (1)   | 68 (12)     | 62 (3)  | 80 (1)      |
| 2G3   | -2 (2)    | -1 (2)  | 25 (1)  | 27 (9)  | 59 (15)     | -3 (2)  | 69 (0)      | 59 (3)  | 63 (4)      |
| 2H12  | 29 (2)    | 31 (2)  | 41 (6)  | 39 (5)  | 42 (0)      | 26 (2)  | 92 (5)      | 81 (2)  | 102 (9)     |
| 2H21  | 59 (3)    | 83 (0)  | 65 (8)  | 51 (12) | 112 (8)     | 5 (2)   | 83 (1)      | 81 (14) | 97 (2)      |
| 2J9   | 1 (0)     | 16 (0)  | 42 (14) | 47 (10) | 95 (17)     | 0 (0)   | 82 (9)      | 77 (1)  | 103 (7)     |
| 2K2   | 77 (8)    | 1 (1)   | 51 (5)  | 61 (3)  | 108 (9)     | 59 (19) | 63 (6)      | 86 (9)  | 103<br>(19) |
| 2M2   | 85 (2)    | 74 (4)  | 64 (5)  | 86 (3)  | 119 (3)     | 89 (2)  | 41 (6)      | 77 (4)  | 102 (3)     |
| 4E9   | 53 (13)   | 65 (21) | 54 (10) | 64 (28) | 135<br>(16) | 50 (11) | 39 (5)      | 73 (13) | 109<br>(32) |
| 4F8   | 59 (3)    | 4 (0)   | 24 (6)  | 49 (9)  | 86 (15)     | 99 (3)  | 104<br>(12) | 81 (7)  | 89 (13)     |
| 4G21  | 36 (5)    | 48 (4)  | 21 (5)  | 36 (7)  | 0 (1)       | 76 (0)  | 84 (2)      | 71 (4)  | 97 (12)     |
| 5E15  | 38(6)     | 3 (0)   | 38 (12) | 52 (13) | 122<br>(11) | 86 (14) | 96 (6)      | 73 (2)  | 101<br>(17) |
| 5G22  | 30(1)     | 0 (0)   | 1 (0)   | 28 (1)  | 81 (7)      | 2 (2)   | 58 (6)      | 55 (0)  | 74 (1)      |
| 5M22  | 48(7)     | 47 (6)  | 49 (8)  | 55 (0)  | 69 (11)     | 66 (6)  | 50 (5)      | 62 (5)  | 88 (6)      |

**Table S2. Summary data for DENV3 residues critical for MAb binding.** Reactivities for mAbs with DENV3 prM/E mutants are expressed as percent of their binding to wild-type prM/E, with ranges (half of the maximum minus minimum values) in parentheses. At least two replicate values were obtained for each experiment. ND, not determined
